# Supplementary material
Source: PubMed Central journal article supplement (PMC3102013)

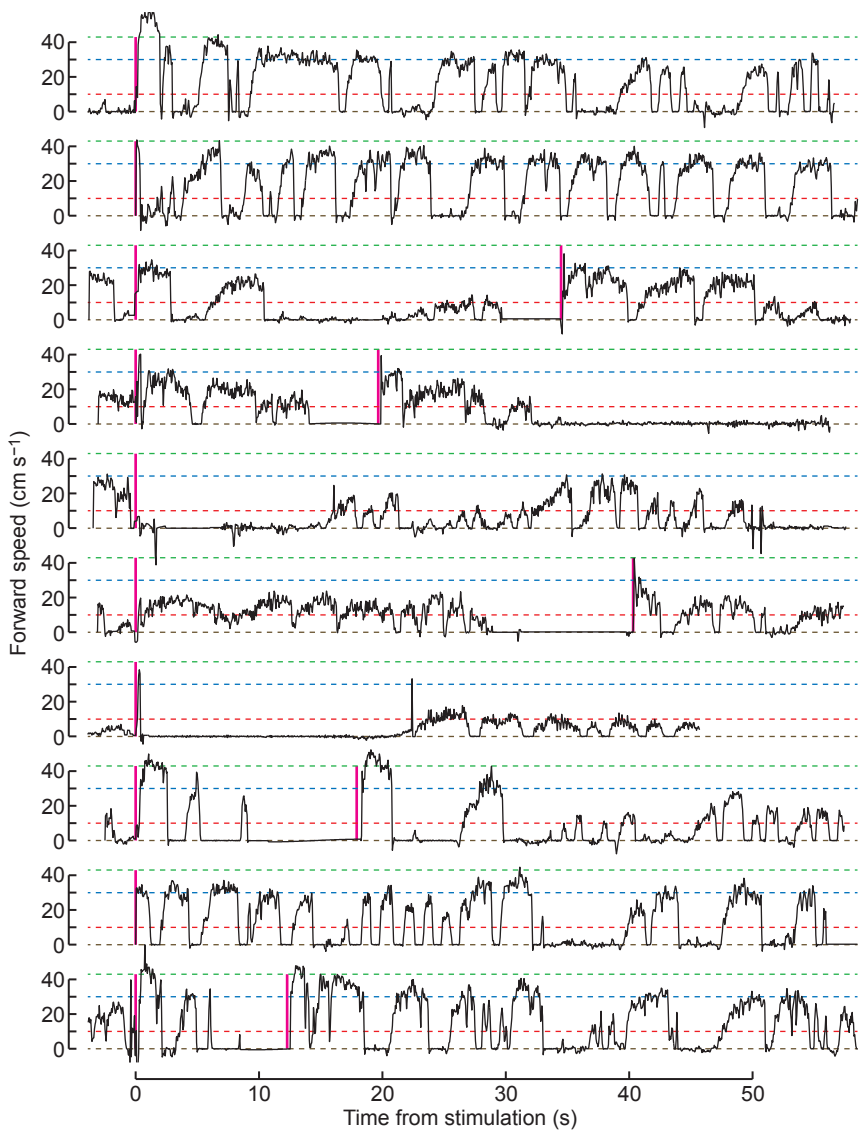

Supplement: supp_214.12.2057_JEB056481FigS1.pdf [file supp_214.12.2057_JEB056481FigS1.pdf]
